# Supplementary material
Source: PubMed Central journal article supplement (PMC4203427)
Supplement: NIHMS624740-supplement-1.pdf [file NIHMS624740-supplement-1.pdf]

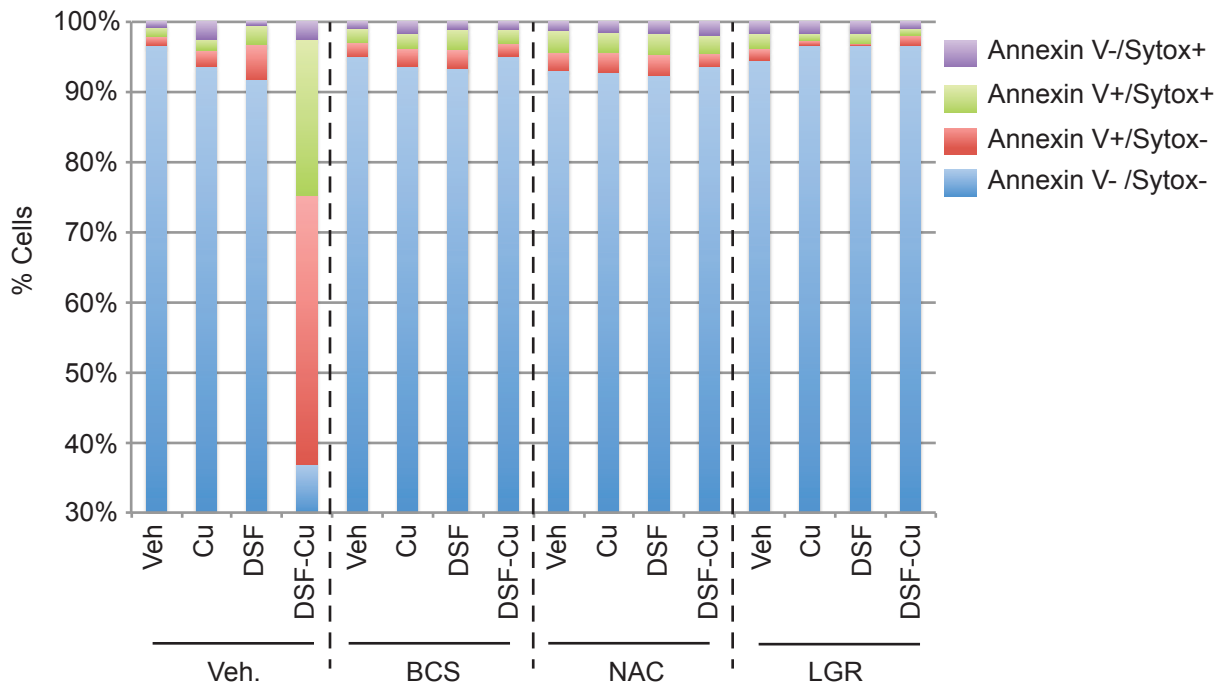

Supplemental figure S1

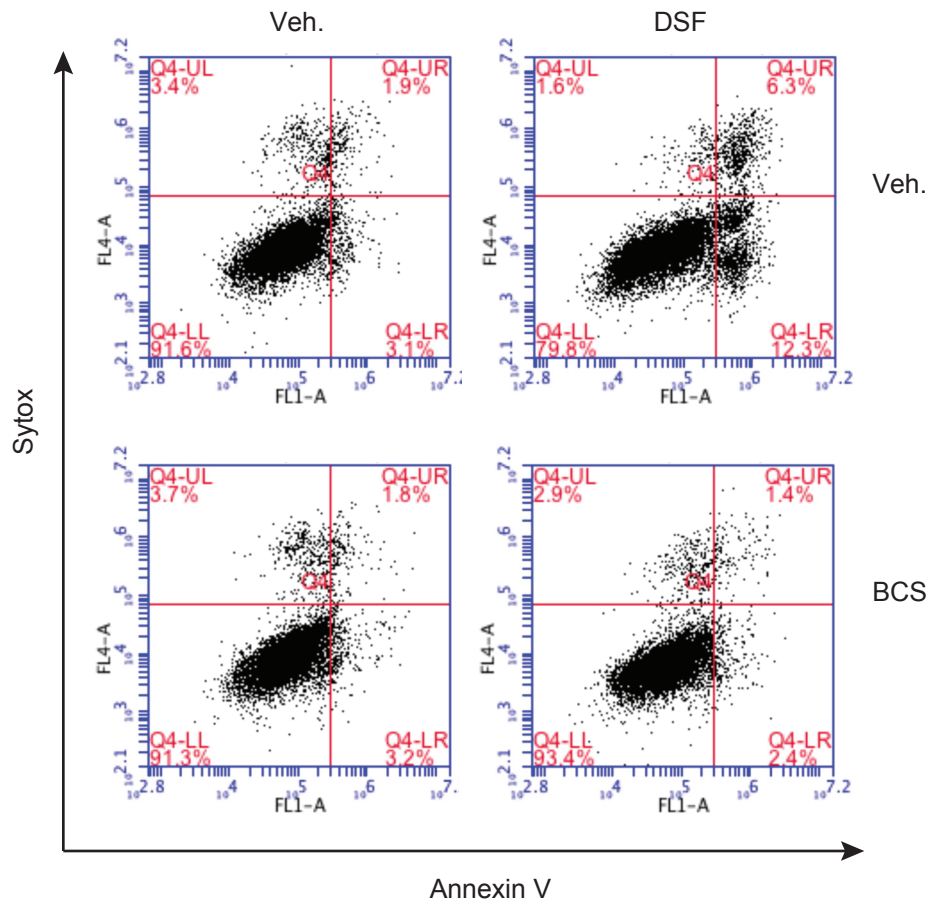

Supplemental figure S2

22RV1 Cells

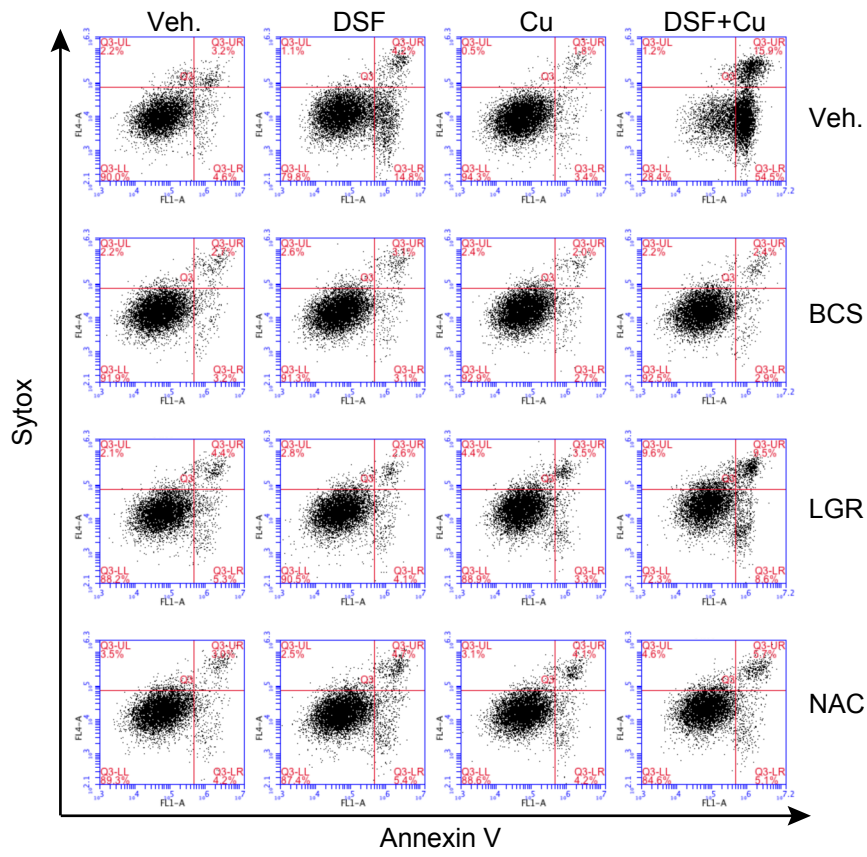

Supplemental figure S3

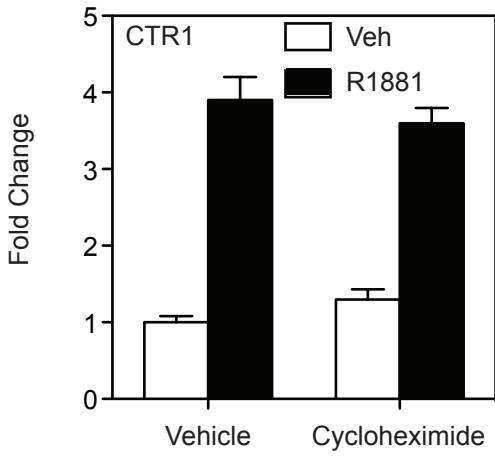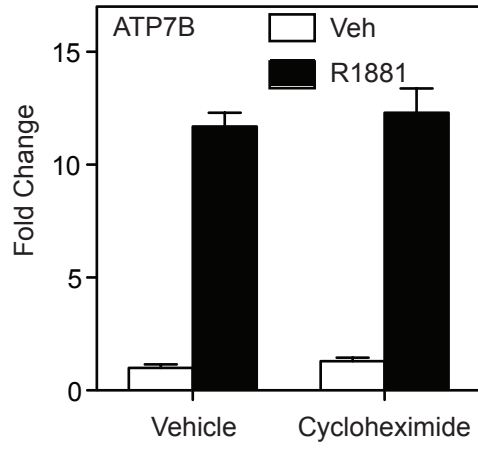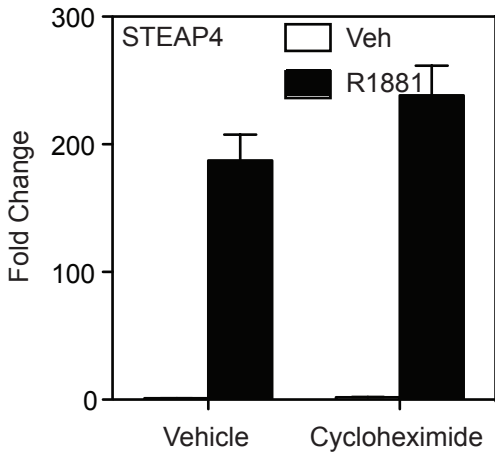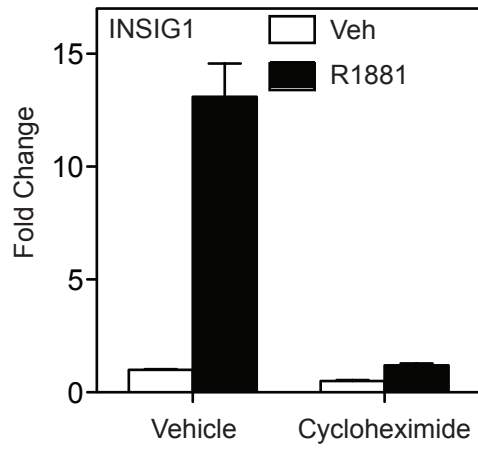

Supplemental figure S4

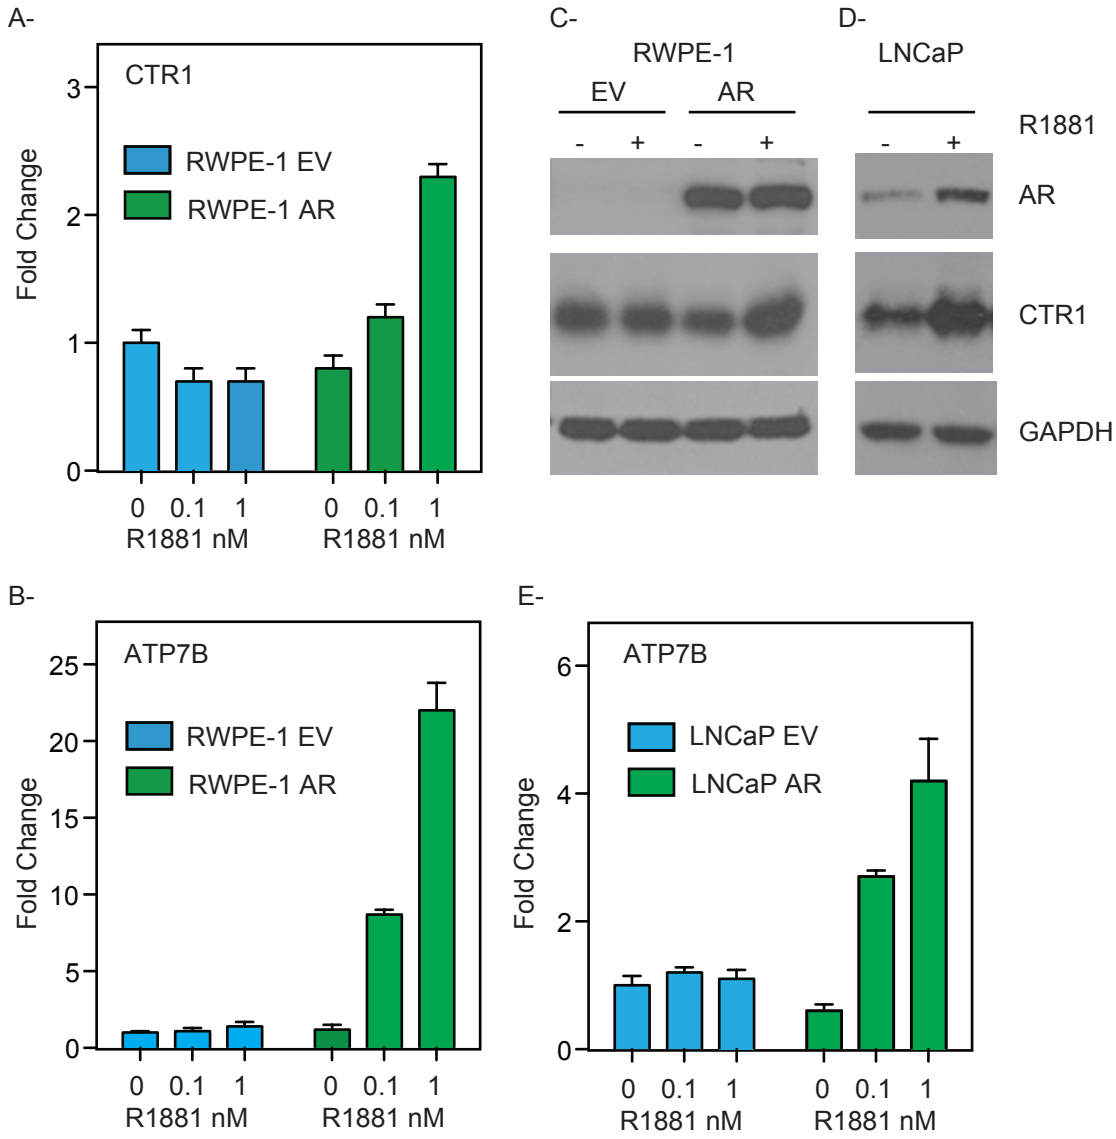

Supplemental figure S5

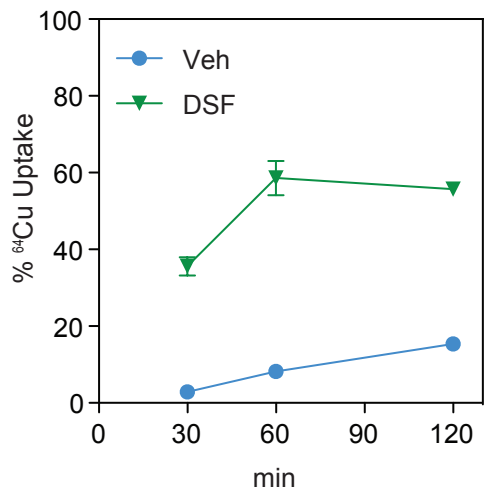

Supplemental figure S6
